# Supplementary material
Source: publisher figshare collection journal article supplement (https://frontiersin.figshare.com/ndownloader/files/26595446)

# WSB316\_ATAC

For guidance, please consult ["Interpreting Cell Ranger ATAC Web Summary Files"](#) or contact 10x Genomics Support ([support@10xgenomics.com](mailto:support@10xgenomics.com))

## 7,711

Estimated number of cells

## 6,338

Median fragments per cell

## 74.9%

Fraction of fragments overlapping any targeted region

## 54.4%

Fraction of transposition events in peaks in cell barcodes

## Sample

|                    |                            |
|--------------------|----------------------------|
| Sample ID          | WSB316_ATAC                |
| Sample description |                            |
| FASTQ path         | ...200508/ATAC/WSB316_ATAC |
| Pipeline version   | 1.2.0                      |
| Reference path     | ...abase/ATAC/Homo_sapiens |
| Organism           | Homo_sapiens               |
| Assembly           | custom                     |
| Annotation         | custom                     |

## Sequencing ?

|                                             |             |
|---------------------------------------------|-------------|
| Total number of read pairs                  | 375,019,150 |
| Fraction of read pairs with a valid barcode | 98.1%       |
| Q30 bases in Read 1                         | 92.9%       |
| Q30 bases in Read 2                         | 92.8%       |
| Q30 bases in Barcode                        | 90.3%       |
| Q30 bases in Sample Index                   | 91.2%       |

## Cells ?

|                                                                                                      |        |
|------------------------------------------------------------------------------------------------------|--------|
| Estimated number of cells                                                                            | 7,711  |
| Lower threshold on the number of fragments overlapping peaks per barcode to annotate barcode as cell | 815.00 |
| Median fragments per cell                                                                            | 6,338  |
| Median fragments per non-cell barcode                                                                | 1      |

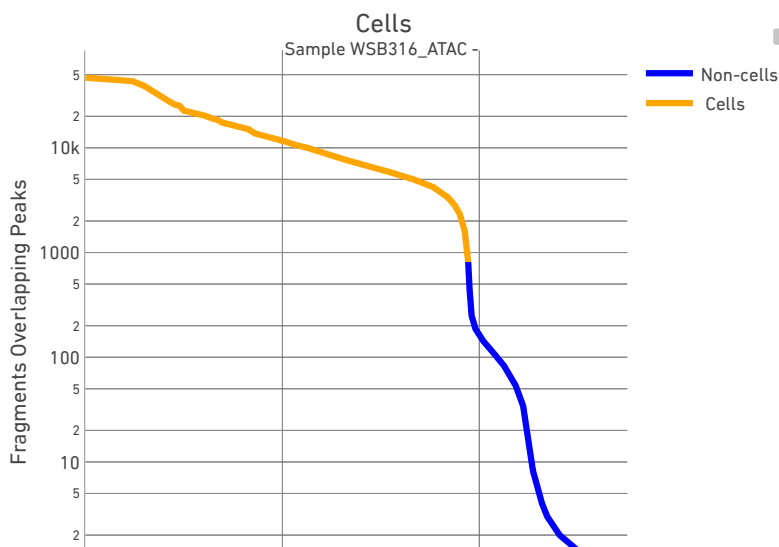

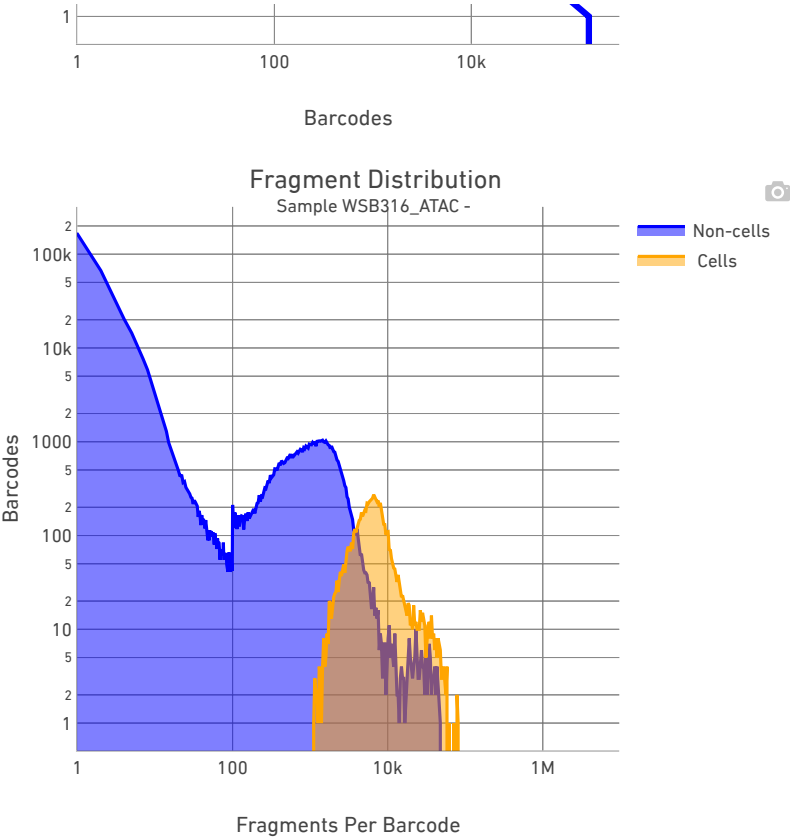

Cell Clustering ?

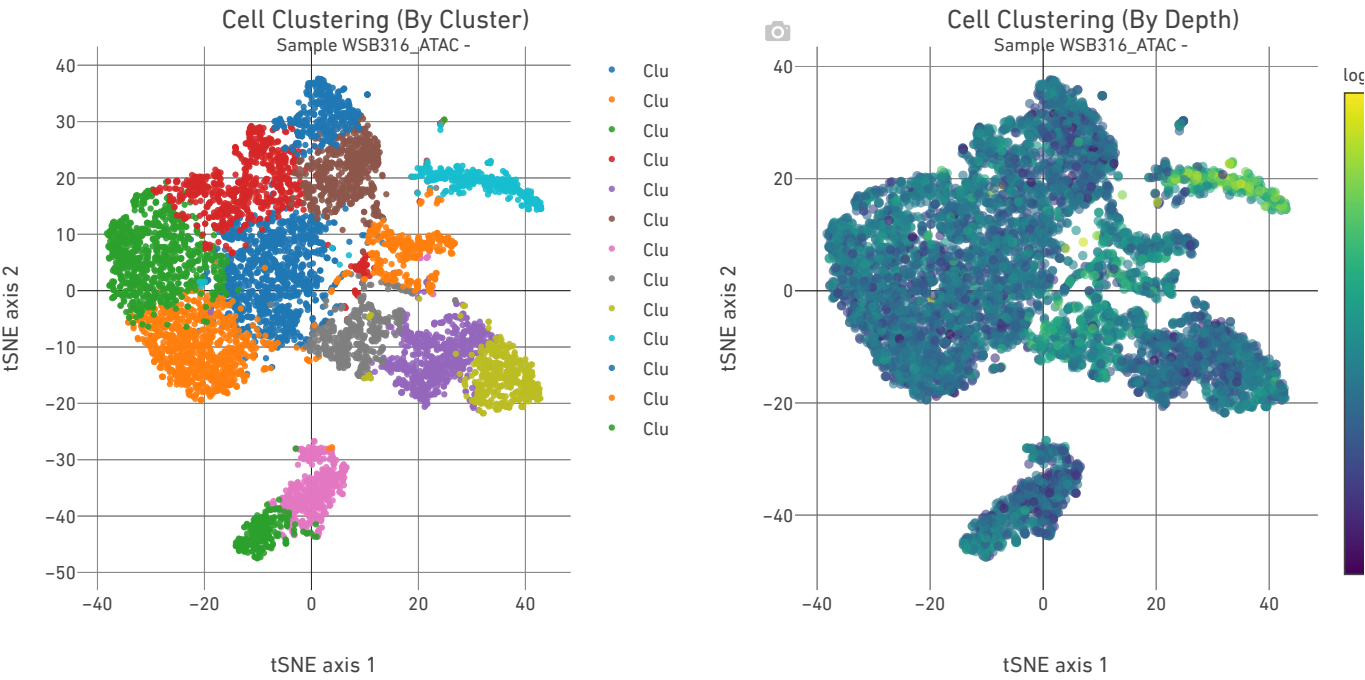

Insert Sizes ?

|                                        |       |
|----------------------------------------|-------|
| Fragments in nucleosome-free regions   | 56.8% |
| Fragments flanking a single nucleosome | 40.7% |

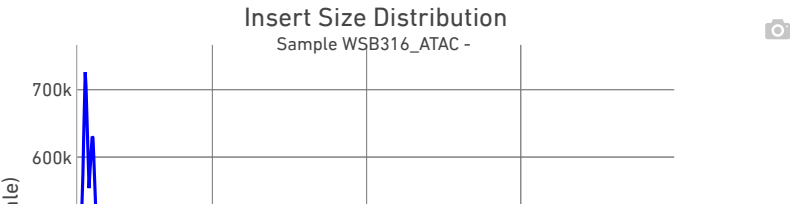

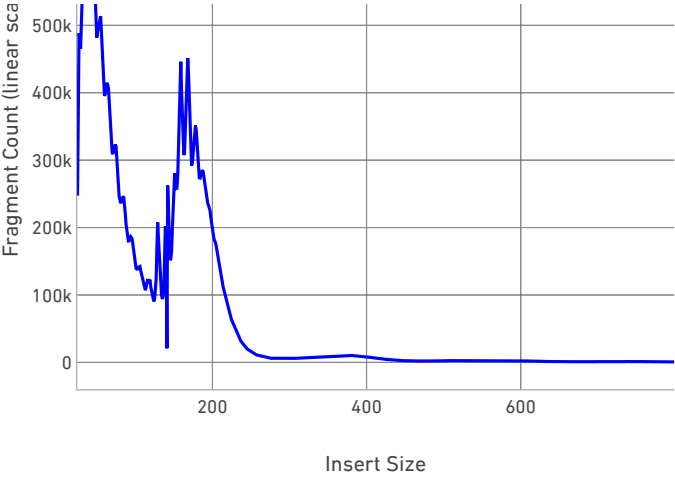

Targeting ?

|                                                                      |       |
|----------------------------------------------------------------------|-------|
| Enrichment score of transcription start sites                        | 8.64  |
| Fraction of fragments overlapping TSS                                | 49.5% |
| Fraction of fragments overlapping called peaks                       | 55.4% |
| Fraction of transposition events in peaks in cell barcodes           | 54.4% |
| Fraction of fragments overlapping any targeted region                | 74.9% |
| Fraction of total read pairs mapped confidently to genome (>30 mapq) | 83.8% |
| Fraction of total read pairs that are unmapped and in cell barcodes  | 0.2%  |
| Fraction of total read pairs in mitochondria and in cell barcodes    | 0.1%  |

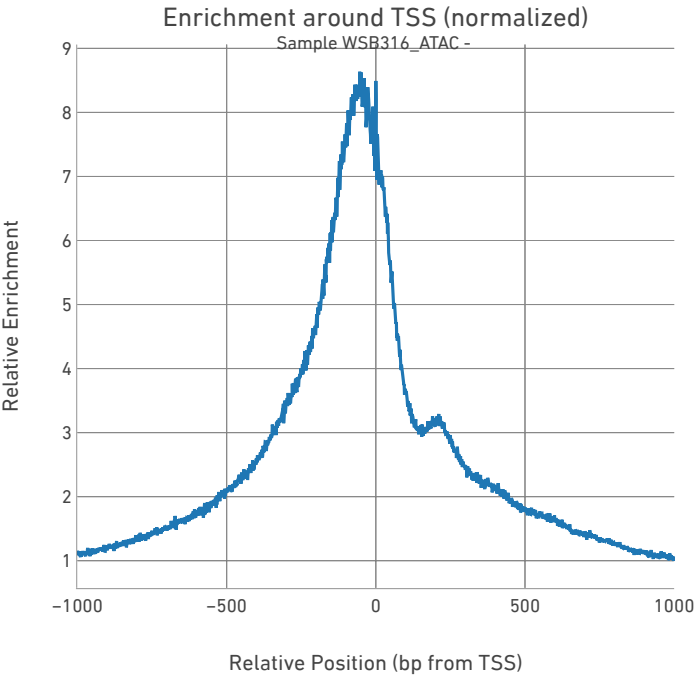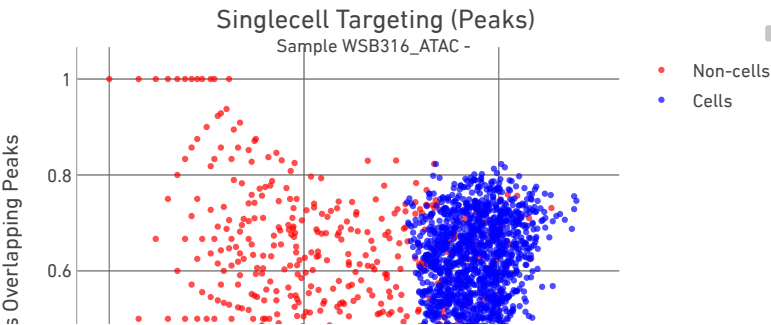

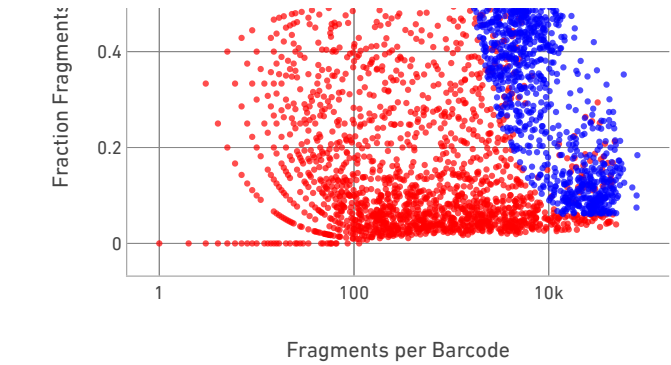

Library Complexity ?

|                                   |             |
|-----------------------------------|-------------|
| Percent duplicates                | 12.9%       |
| Sequencing saturation             | 58.7%       |
| Estimated bulk library complexity | 231,609,107 |

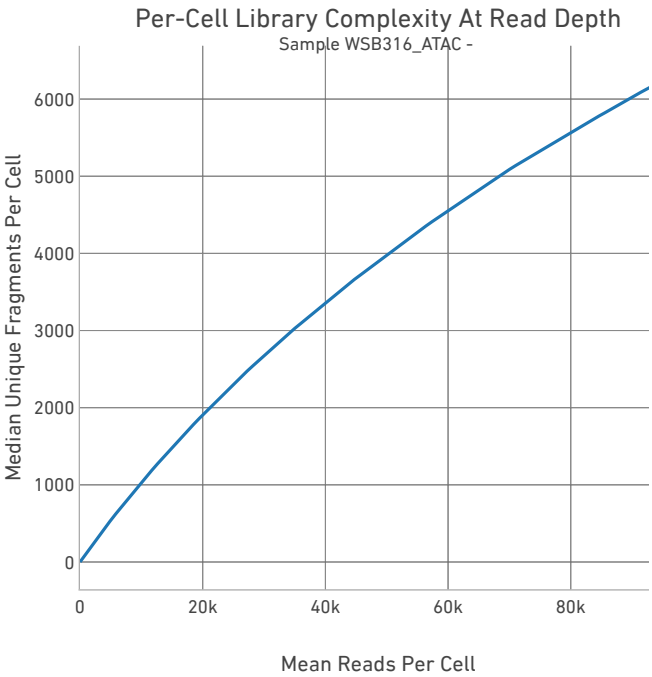

Supplement: Supplementary file [file 26595446]
